# Supplementary material for: An examination of behavioural and emotional problems in children exposed prenatally to the 27F Chilean earthquake: findings from the ELPI cohort
Source: Springer Nature journal article supplement (doi:10.1007/s00127-023-02433-z), 2023-02-17
Supplement: MOESM1 [file 24039242]

**Article title:** An examination of behavioural and emotional problems in children exposed prenatally to the 27F Chilean earthquake: Findings from the ELPI cohort

**Journal name:** Social Psychiatry and Psychiatric Epidemiology

**Author names:** María Francisca Morales<sup>a</sup> (ORCID: 0000-0002-1971-8085), Lisa-Christine Girard<sup>b</sup> (ORCID: 0000-0003-3817-034X), Vilas Sawrikar<sup>a</sup> (ORCID: 0000-0001-8160-0232), Angus MacBeth<sup>a</sup> (ORCID: 0000-0002-0618-044X).

**Affiliations:** <sup>a</sup>Department of Clinical Psychology, School of Health in Social Science, The University of Edinburgh, United Kingdom. <sup>b</sup>Department of Psychosocial Science, University of Bergen, Norway.

**Corresponding author:** María Francisca Morales, mariafrancisca.morales@ed.ac.uk

### Supplementary file I: Matching Algorithms

#### Nearest neighbour with replacement

Table S1: Common support using nearest neighbour with replacement

| Treatment assignment | Off support | On support | Total |
|----------------------|-------------|------------|-------|
| Untreated            | 0           | 933        | 933   |
| Treated              | 0           | 616        | 616   |
| Total                | 0           | 1,549      | 1,549 |

Figure S1: Overlapping Support: Distribution of Propensity Scores using nearest neighbour with replacement

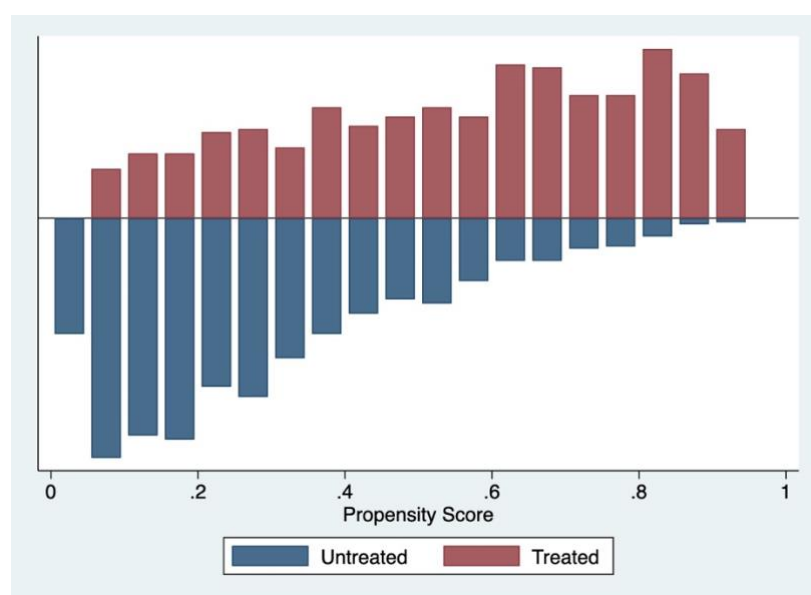

Table S2: Standardised Differences across Covariates: Pre-Matching and Post-Matching using nearest neighbour with replacement

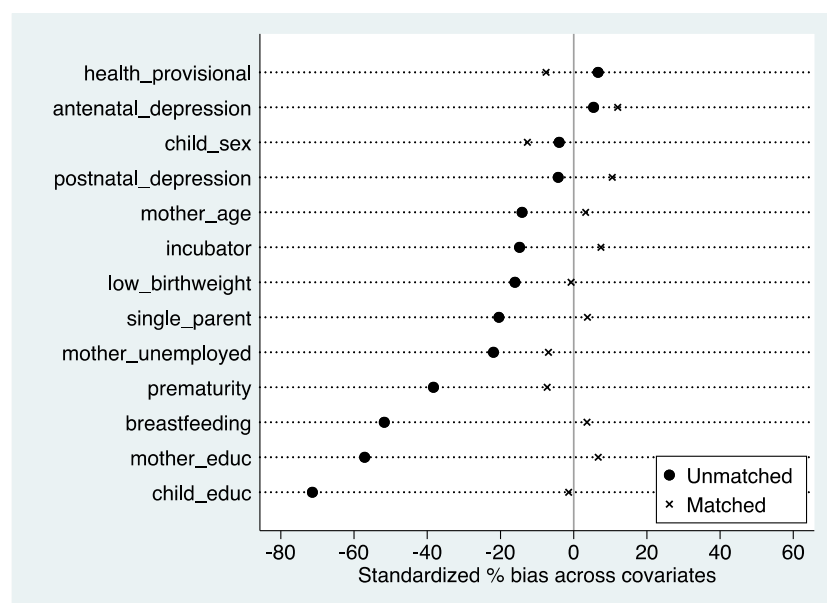

Table S2: Pre-matching and post-matching results on children's behavioural and emotional problems using nearest neighbour with replacement

|                      | Pre-matching |      |      |      |        | Post-matching |       |      |      |        |
|----------------------|--------------|------|------|------|--------|---------------|-------|------|------|--------|
|                      | T            | C    | Diff | SE   | T-stat | T             | C     | Diff | SE   | T-stat |
| Emotionally reactive | 2.64         | 1.81 | 0.83 | 0.13 | 6.62   | 2.64          | 1.79  | 0.85 | 0.24 | 3.52   |
| Anxious/depressed    | 3.87         | 2.94 | 0.93 | 0.13 | 7.19   | 3.87          | 2.83  | 1.04 | 0.26 | 3.93   |
| Somatic complaints   | 2.63         | 2.30 | 0.33 | 0.12 | 2.78   | 2.63          | 2.59  | 0.04 | 0.25 | 0.14   |
| Withdrawn            | 2.49         | 2.34 | 0.15 | 0.11 | 1.38   | 2.49          | 2.29  | 0.19 | 0.24 | 0.81   |
| Sleep problems       | 2.77         | 2.29 | 0.49 | 0.12 | 3.97   | 2.77          | 2.05  | 0.72 | 0.24 | 3.02   |
| Attention problems   | 3.58         | 2.79 | 0.79 | 0.10 | 8.24   | 3.58          | 2.76  | 0.82 | 0.19 | 4.36   |
| Aggression           | 13.81        | 9.98 | 3.83 | 0.38 | 10.03  | 13.81         | 10.19 | 3.62 | 0.78 | 4.61   |

### Nearest neighbour without replacement

Table S3: Common support using nearest neighbour without replacement

| Treatment assignment | Off support | On support | Total |
|----------------------|-------------|------------|-------|
| Untreated            | 0           | 933        | 933   |
| Treated              | 232         | 384        | 616   |
| Total                | 232         | 1,317      | 1,549 |

Figure S3: Overlapping Support: Distribution of Propensity Scores using nearest neighbour without replacement

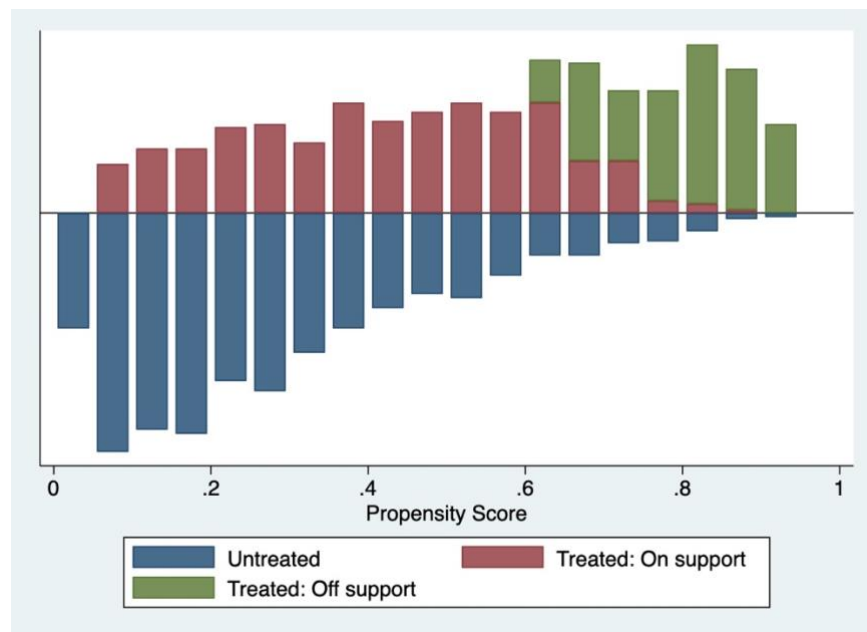

Figure S4: Standardised Differences across Covariates: Pre-Matching and Post-Matching using nearest neighbour without replacement

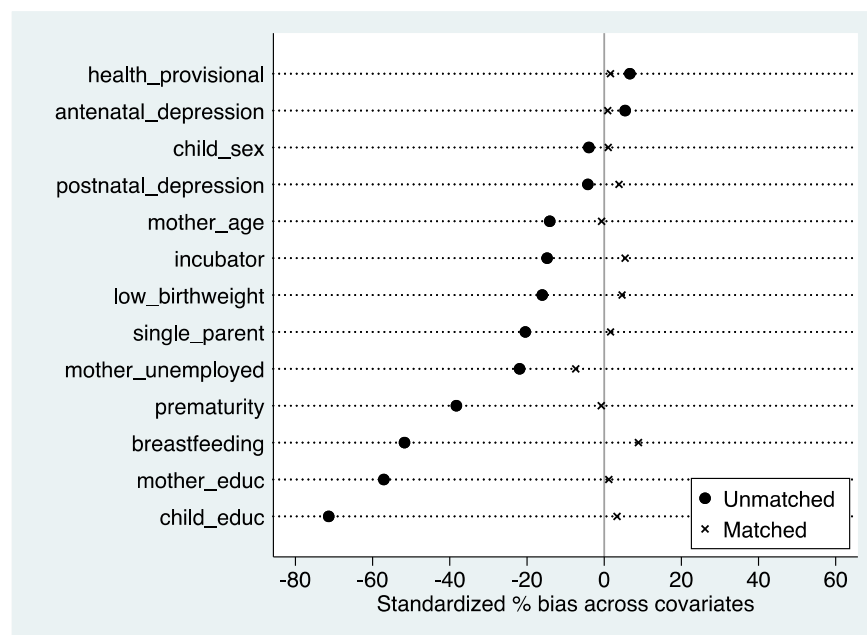

Table S4: Pre-matching and post-matching results on children's behavioural and emotional problems using nearest neighbour without replacement

|                      | Pre-matching |      |      |      |        | Post-matching |      |      |      |        |
|----------------------|--------------|------|------|------|--------|---------------|------|------|------|--------|
|                      | T            | C    | Diff | SE   | T-stat | T             | C    | Diff | SE   | T-stat |
| Emotionally reactive | 2.64         | 1.81 | 0.83 | 0.13 | 6.62   | 2.43          | 1.90 | 0.53 | 0.18 | 2.99   |
| Anxious/depressed    | 3.87         | 2.94 | 0.93 | 0.13 | 7.19   | 3.67          | 3.01 | 0.67 | 0.19 | 3.55   |

|                    |       |      |      |      |       |       |       |       |      |       |
|--------------------|-------|------|------|------|-------|-------|-------|-------|------|-------|
| Somatic complaints | 2.63  | 2.30 | 0.33 | 0.12 | 2.78  | 2.46  | 2.41  | 0.05  | 0.17 | 0.30  |
| Withdrawn          | 2.49  | 2.34 | 0.15 | 0.11 | 1.38  | 2.38  | 2.55  | -0.17 | 0.15 | -1.11 |
| Sleep problems     | 2.77  | 2.29 | 0.49 | 0.12 | 3.97  | 2.70  | 2.22  | 0.48  | 0.18 | 2.72  |
| Attention problems | 3.58  | 2.79 | 0.79 | 0.10 | 8.24  | 3.47  | 2.82  | 0.65  | 0.14 | 4.79  |
| Aggression         | 13.81 | 9.98 | 3.83 | 0.38 | 10.03 | 13.31 | 10.35 | 2.96  | 0.56 | 5.32  |

**Kernel with common support**

Table S5: Common support using Kernel with common support

| Treatment assignment | Off support | On support | Total |
|----------------------|-------------|------------|-------|
| Untreated            | 0           | 933        | 933   |
| Treated              | 8           | 608        | 616   |
| Total                | 8           | 1,541      | 1,549 |

Figure S5: Overlapping Support: Distribution of Propensity Scores using Kernel with common support

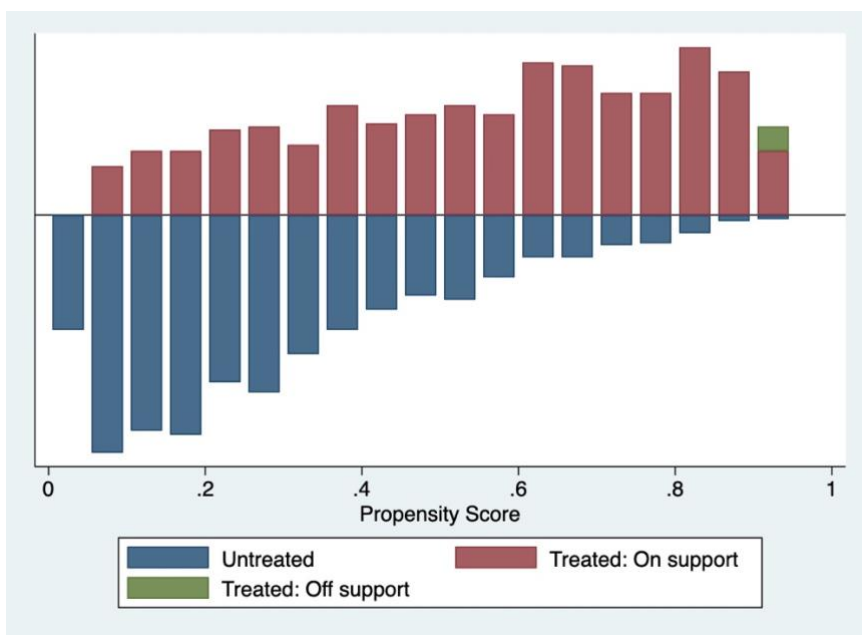

Figure S6: Standardised Differences across Covariates: Pre-Matching and Post-Matching using Kernel with common support

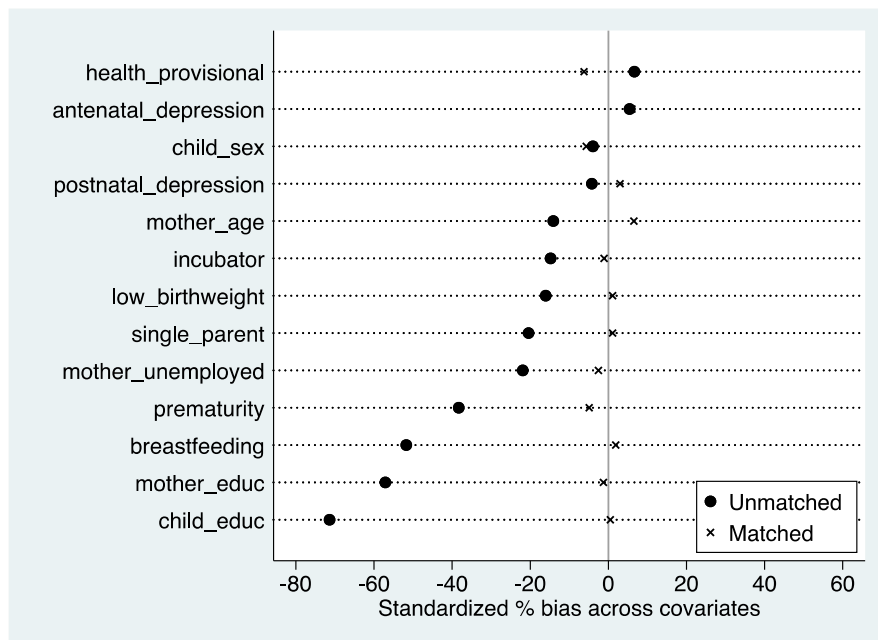

Table S6: Pre-matching and post-matching results on children’s behavioural and emotional problems using Kernel with common support

|                      | Pre-matching |      |      |      |        | Post-matching |       |      |      |        |
|----------------------|--------------|------|------|------|--------|---------------|-------|------|------|--------|
|                      | T            | C    | Diff | SE   | T-stat | T             | C     | Diff | SE   | T-stat |
| Emotionally reactive | 2.64         | 1.81 | 0.83 | 0.13 | 6.62   | 2.64          | 1.95  | 0.69 | 0.18 | 3.76   |
| Anxious/depressed    | 3.87         | 2.94 | 0.93 | 0.13 | 7.19   | 3.86          | 3.02  | 0.84 | 0.19 | 4.41   |
| Somatic complaints   | 2.63         | 2.30 | 0.33 | 0.12 | 2.78   | 2.62          | 2.52  | 0.10 | 0.18 | 0.57   |
| Withdrawn            | 2.49         | 2.34 | 0.15 | 0.11 | 1.38   | 2.49          | 2.39  | 0.10 | 0.17 | 0.58   |
| Sleep problems       | 2.77         | 2.29 | 0.49 | 0.12 | 3.97   | 2.79          | 2.06  | 0.73 | 0.18 | 3.99   |
| Attention problems   | 3.58         | 2.79 | 0.79 | 0.10 | 8.24   | 3.59          | 2.75  | 0.83 | 0.14 | 5.86   |
| Aggression           | 13.81        | 9.98 | 3.83 | 0.38 | 10.03  | 13.86         | 10.33 | 3.54 | 0.56 | 6.34   |
